# Supplementary material for: Structural, optical and photocatalytic properties of mesoporous CuO nanoparticles with tunable size and different morphologies
Source: Royal Society of Chemistry journal article supplement (doi:10.1039/d1ra04780a), 2021-01-01
Supplement: d1ra04780a1.pdf [file d1ra04780a1.pdf]

# **Structural, optical and photocatalytic properties of mesoporous CuO nanoparticles with tunable size and different morphologies**

*Mohamed I. Said<sup>a,\*</sup>, A. A. Othman<sup>b</sup> and Esraa M. Abd elhakeem<sup>b</sup>*

<sup>a</sup> Chemistry Department, Faculty of Science, Assiut University 71516, Assiut, Egypt

<sup>b</sup> Physics Department, Faculty of Science, Assiut University 71516, Assiut, Egypt

\* Corresponding author

**Tel.: 00201009288594**

**e-mail: moh\_chem1@yahoo.com**

## **Keywords**

CuO nanoparticles; Ethanol-water solution; Rietveld method; Optical properties; Congo red and Dye remediation

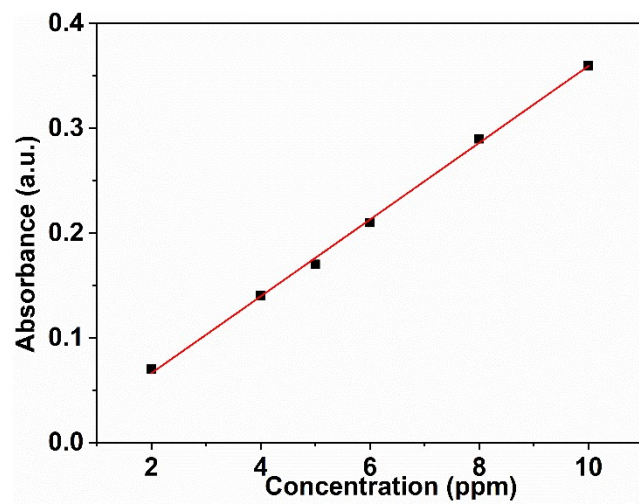

**Figure S1.** Calibration curve for variation of the absorbance against the concentration of Congo red.
